# Supplementary material for: Randomized Trial of an Integrated Behavioral Health Home: The Health Outcomes Management and Evaluation (HOME) Study
Source: Atypon-hosted journal article supplement (doi:10.1176/appi.ajp.2016.16050507), 2016-09-15
Supplement: appi.ajp.2016.16050507.ds001.pdf [file appi.ajp.2016.16050507.ds001.pdf]

## **Measures for Quality of Preventive and Cardiometabolic Care**

### **RAND Measures**

#### **Hypertension**

- 1:** Systolic and diastolic blood pressure should be measured on patients.
- 2:** All patients with average blood pressures of >140 systolic and/or >90 diastolic as determined on at least 3 separate visits should have a diagnosis of hypertension documented in the record.
- 3:** Patients with a new diagnosis of stage 1-3 hypertension should have at least 3 measurements on different days with a mean SBP>140 and/or a mean DBP>90.
- 4:** Hypertension patients should not have the drug which could cause hypertension.
- 5:** Initial lab test should include at least 5 of the following:
  - a. Urinalysis
  - b. Blood glucose
  - c. Serum creatinine
  - d. Serum cholesterol
  - e. Serum triglyceride
  - f. Serum Potassium
- 6:** For patients with stage 1-3 hypertension, the medical record should indicate counseling for at least 1 of the following interventions
  - a. Weight reduction if obese
  - b. Increased physical activity if sedentary
  - c. Low sodium diet.

#### **Hyperlipidemia**

- 1:** Men under age 70 with preexisting heart disease should have cholesterol level documented.
- 2:** Men under age 70 with coronary disease should have total cholesterol documented.
- 3:** Men under age 70 with preexisting coronary disease should have a measure of their LDL cholesterol document.
- 4:** Patients without preexisting coronary disease who are on pharmacological treatment for hyperlipidemia should have had measurements of their cholesterol (total or LDL) documented.
- 5:** Men under age 70 with preexisting coronary disease who have an LDL cholesterol level >130mg/dl should have diet or drug therapy.
- 6:** Men under age 70 with preexisting coronary disease who have an LDL level >130mg/dl should receive one of the following:
  - a. Pharmacological therapy for hyperlipidemia; or
  - b. LDL measurements.

## Diabetes

- 1:** Patient with fasting food blood sugar >126 or postprandial blood sugar >200 should have a diagnosis of diabetes noted in progress notes or problem list.
- 2:** Patients with the diagnosis of diabetes should have all of the following:
  - A. Eye and visual exam
  - B. Total serum cholesterol and HDL cholesterol tests
  - C. Measurement of urine protein
  - D. Examination of feet
  - E. Measurement of blood pressure
- 3:** Diabetics should receive dietary and exercise counseling.
- 4:** Diabetics should receive oral hypoglycemic therapy.
- 5:** Diabetics should be offered insulin.
- 6:** Hypertensive diabetics should be offered an ACE inhibitor or a calcium channel blocker.
- 7:** All patients with diabetes should have a follow-up visit.

**Table S1. Preventive Services Indicators**

| Gender | Age   | Service                                                                                 | Frequency                |
|--------|-------|-----------------------------------------------------------------------------------------|--------------------------|
| A      | 18+   | Blood pressure screening                                                                | Every 1-2 years          |
| F      | 40+   | Mammogram                                                                               | Every 1-2 years          |
| F      | 21+   | Pap Smear                                                                               | Every 3 years            |
| F      | < 24  | Chlamydia and Gonorrhea Screening                                                       | Varies                   |
| M      | 35+   | Cholesterol abnormalities screening                                                     | Every 5 years            |
| A      | 50-75 | Colorectal cancer screening (fecal occult blood testing, sigmoidoscopy, or colonoscopy) | Varies                   |
| A      | 18+   | Diabetes Screening                                                                      | 3 year interval          |
| A      | 15-65 | HIV screening                                                                           | Varies depending on risk |
| A      | 18+   | Obesity screening and counselling                                                       | N/A                      |
| A      | 18+   | Tobacco use counselling and interventions                                               | N/A                      |
| A      | 18+   | STI counselling                                                                         | N/A                      |

**Table S2. Comparison of Study Participants With and Without Missing Data at 12-Month Follow-Up**

| <i>Lost to Follow-Up Versus Completed Follow-Up: Baseline Demographics</i> |                          |                                 |          |
|----------------------------------------------------------------------------|--------------------------|---------------------------------|----------|
| <i>Characteristic</i>                                                      | <i>Completed (n=345)</i> | <i>Lost to Follow-Up (n=83)</i> | <i>p</i> |
| Age, years, mean (SD)                                                      | 47.74 (9.63)             | 44.81 (9.16)                    | 0.01     |
| Male                                                                       | 133 (38.55)              | 34 (40.96)                      | 0.69     |
| Single                                                                     | 119 (36.73)              | 24 (31.17)                      | 0.36     |
| racegroup                                                                  |                          |                                 | .        |
| White                                                                      | 191 (55.36)              | 47 (56.63)                      | 0.84     |
| Black                                                                      | 141 (40.87)              | 33 (39.76)                      | 0.85     |
| Other Race                                                                 | 13 (3.77)                | 3 (3.61)                        | 0.95     |
| Hispanic                                                                   | 5 (1.45)                 | 3 (3.61)                        | 0.19     |
| Education, years, mean (SD)                                                | 12.77 (2.38)             | 12.76 (2.18)                    | 0.97     |
| Stable Housing                                                             | 298 (86.38)              | 68 (81.93)                      | 0.3      |
| Stable Employment                                                          | 124 (35.94)              | 29 (34.94)                      | 0.86     |
| Total monthly income, \$, mean (SD)                                        | 530.69 (653.88)          | 457.10 (560.25)                 | 0.3      |
| Disability                                                                 | 35 (10.20)               | 8 (9.64)                        | 0.88     |
| Medicaid                                                                   | 32 (9.33)                | 4 (4.82)                        | 0.38     |
| Medicare                                                                   | 33 (9.62)                | 2 (2.41)                        | 0.1      |
| Private Insurance                                                          | 10 (2.90)                | 3 (3.61)                        | 0.73     |
| sourcegroup                                                                |                          |                                 | .        |
| Other (not ER)                                                             | 133 (38.55)              | 27 (32.53)                      | 0.31     |
| Emergency Room                                                             | 68 (19.71)               | 22 (26.51)                      | 0.17     |
| None                                                                       | 143 (41.45)              | 34 (40.96)                      | 0.94     |
| medgroup                                                                   |                          |                                 | .        |
| Diabetes                                                                   | 132 (38.26)              | 38 (45.78)                      | 0.21     |
| Heart Disease                                                              | 25 (7.25)                | 4 (4.82)                        | 0.43     |
| Hyperlipidemia                                                             | 223 (64.64)              | 48 (57.83)                      | 0.25     |
| Hypertension                                                               | 270 (78.26)              | 73 (87.95)                      | 0.05     |
| Number of Medical Diagnoses, mean (SD)                                     | 1.88 (0.85)              | 1.96 (0.82)                     | 0.44     |
| mentgroup                                                                  |                          |                                 | .        |

***Lost to Follow-Up Versus Completed Follow-Up: Baseline Demographics***

| <b><i>Characteristic</i></b>           | <b><i>Completed (n=345)</i></b> | <b><i>Lost to Follow-Up<br/>(n=83)</i></b> | <b><i>p</i></b> |
|----------------------------------------|---------------------------------|--------------------------------------------|-----------------|
| Schizophrenia/Schizoaffective Disorder | 76 (22.03)                      | 9 (10.84)                                  | 0.02            |
| Bipolar Disorder                       | 173 (50.14)                     | 46 (55.42)                                 | 0.39            |
| Depression                             | 93 (26.96)                      | 27 (32.53)                                 | 0.31            |
| Anxiety                                | 2 (0.58)                        | 1 (1.20)                                   | 0.54            |
| Substance Abuse                        | 1 (0.29)                        |                                            | 0.62            |
| Systolic Blood Pressure                | 137.05 (18.36)                  | 139.48 (19.32)                             | 0.29            |
| Diastolic Blood Pressure               | 89.46 (12.30)                   | 91.60 (12.45)                              | 0.16            |
| Total Cholesterol                      | 203.21 (42.03)                  | 196.76 (47.27)                             | 0.22            |
| LDL                                    | 125.19 (40.67)                  | 118.04 (40.11)                             | 0.17            |
| HDL                                    | 45.07 (17.73)                   | 46.26 (14.00)                              | 0.52            |
| triglycerides                          | 176.00 (112.63)                 | 169.70 (111.90)                            | 0.65            |
| Blood Glucose                          | 112.92 (41.73)                  | 120.60 (53.99)                             | 0.23            |
| Weight, lbs                            | 211.89 (55.86)                  | 214.37 (50.41)                             | 0.71            |
| Body Mass Index                        | 33.82 (8.45)                    | 33.64 (7.08)                               | 0.84            |
